# Supplementary material
Source: MDPI journal article supplement (https://www.mdpi.com/2079-6412/9/5/345)
Supplement: s1 [file s1]

# Supplementary Materials: The Role of Substrate Temperature and Magnetic Filtering for DLC by Cathodic Arc Evaporation

Helge Lux <sup>1,\*</sup>, Matthias Edling <sup>1</sup>, Massimiliano Lucci <sup>2</sup>, Julia Kitzmann <sup>3</sup>, Claus Villringer <sup>1</sup>, Peter Siemroth <sup>4</sup>, Fabio De Matteis <sup>5</sup> and Sigurd Schrader <sup>1</sup>

<sup>1</sup> Department of Engineering and Natural Sciences, Technical University of Applied Sciences Wildau, Hochschulring 1, 15745 Wildau, Germany; edling@th-wildau.de (M.E.); villringer@th-wildau.de (C.V.); schrader@th-wildau.de (S.S.)

<sup>2</sup> Department of Physics, University of Roma Tor Vergata, Via della Ricerca Scientifica, 1, 00133 Roma, Italy; massimiliano.lucci@roma2.infn.it

<sup>3</sup> IHP Innovations for High Performance Microelectronics, Im Technologiepark 25, 15236 Frankfurt (Oder), Germany; kitzmann@ihp-microelectronics.com

<sup>4</sup> Arc Precision GmbH, Schwartzkopffstraße 2, 15745 Wildau, Germany; siemroth@arcprecision.com

<sup>5</sup> Department of Industrial Engineering, University of Rome Tor Vergata, Via del Politecnico 1, 00133 Rome, Italy; demattei@roma2.infn.it

\* Correspondence: lux@th-wildau.de; Tel.: +49-337-550-8119

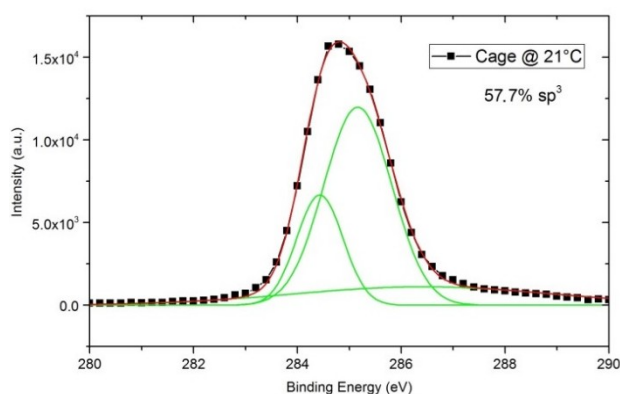

(a)

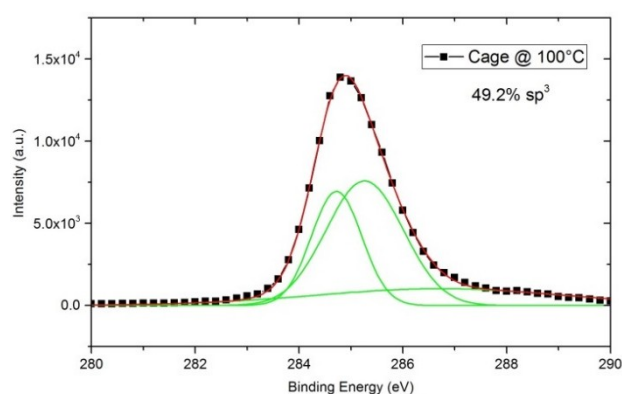

(b)

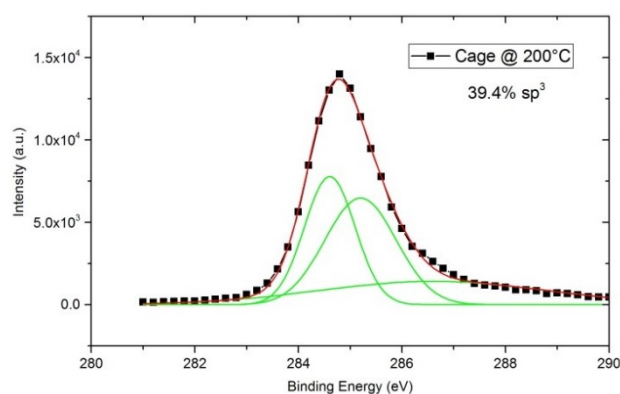

(c)

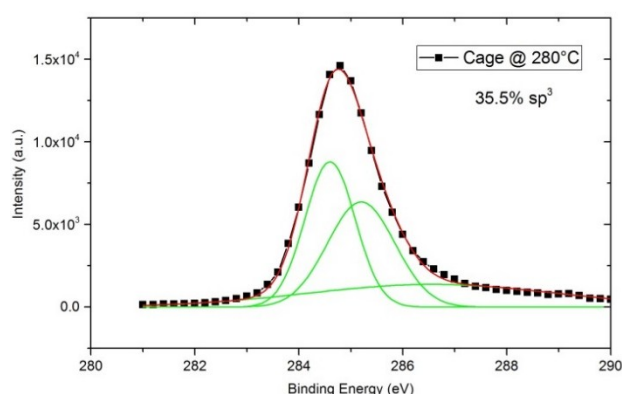

(d)

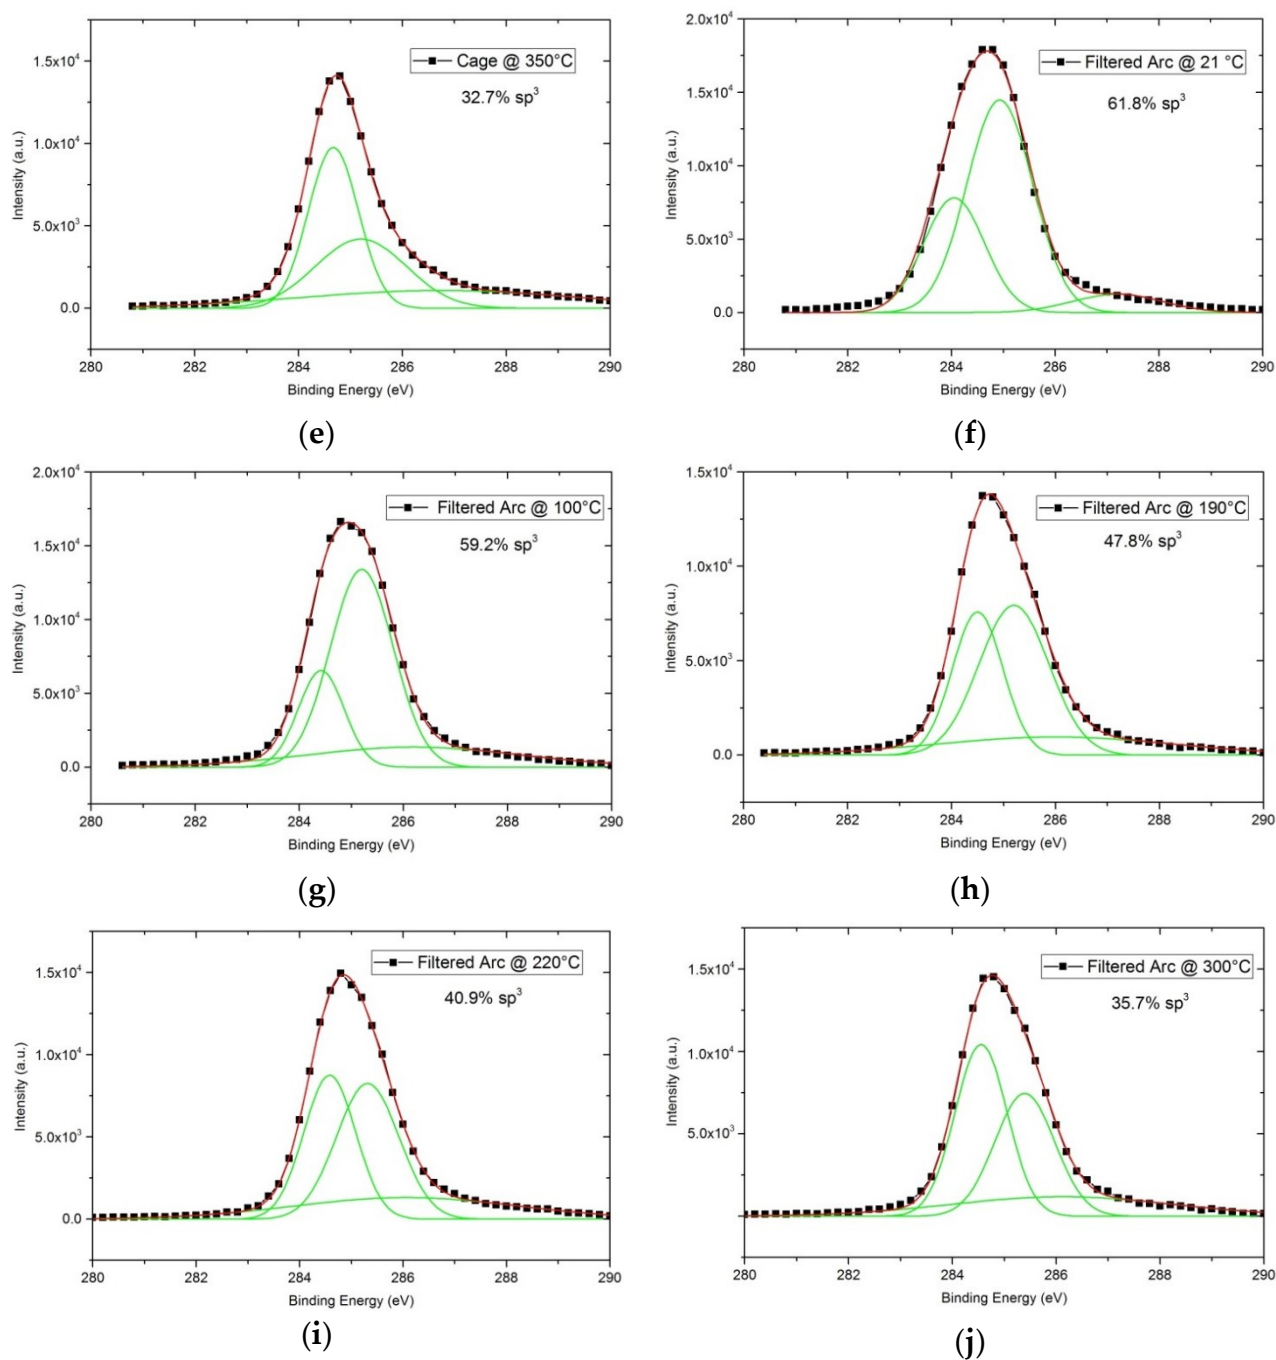

**Figure S1.** XPS spectra with its deconvoluted compounds for  $sp^3$ -carbon (285.2 eV),  $sp^2$ -carbon (284.4 eV) and C-O contamination (286.5 eV) for different substrate temperatures: (a–e) for coated in cage, (f–j) for filtered deposition.

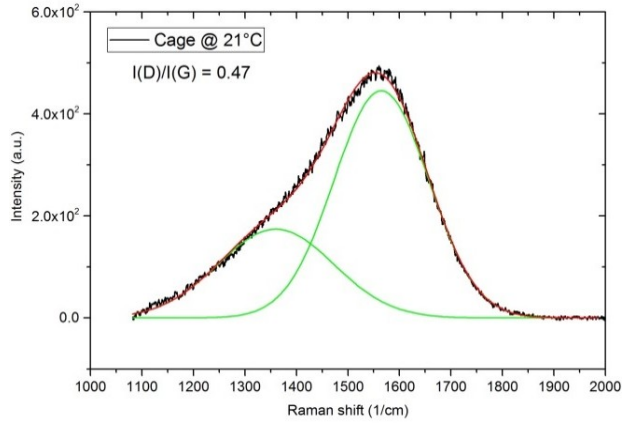

(a)

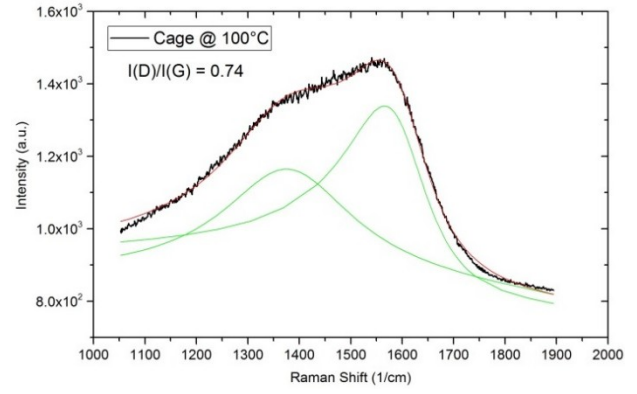

(b)

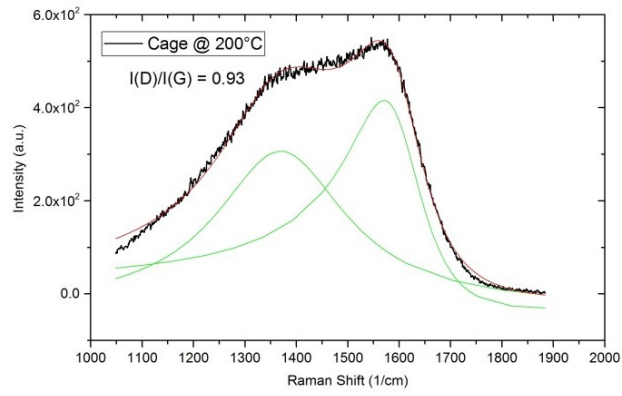

(c)

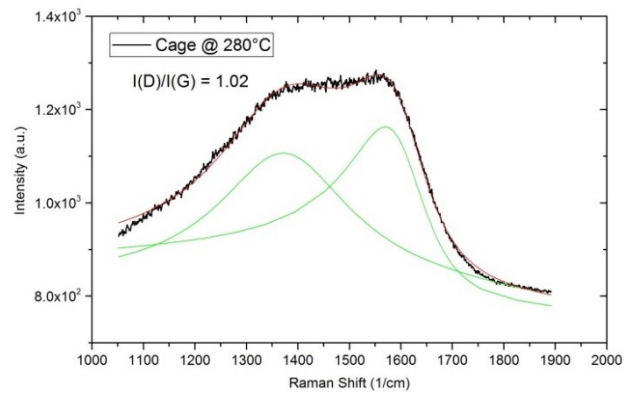

(d)

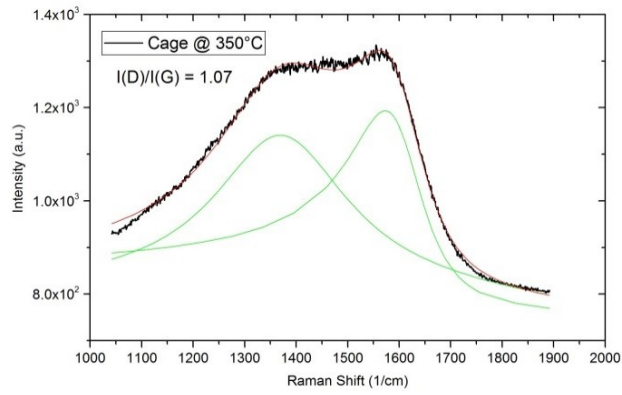

(e)

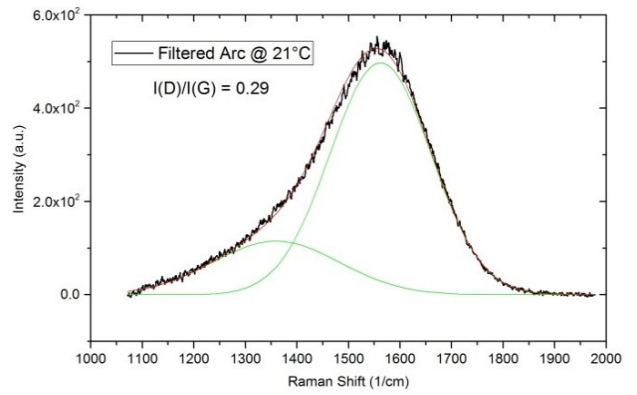

(f)

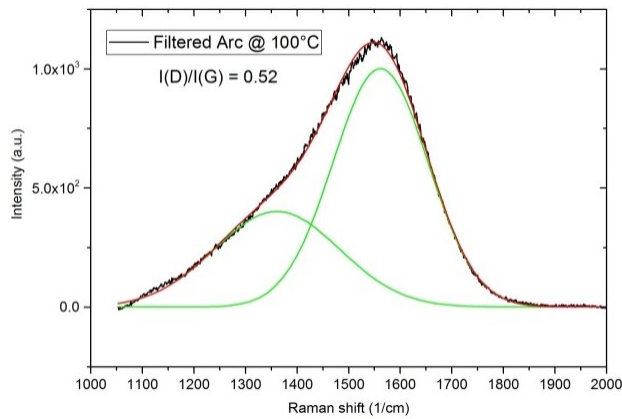

(g)

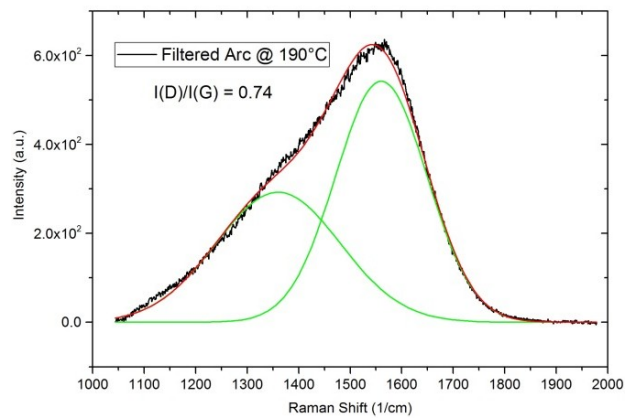

(h)

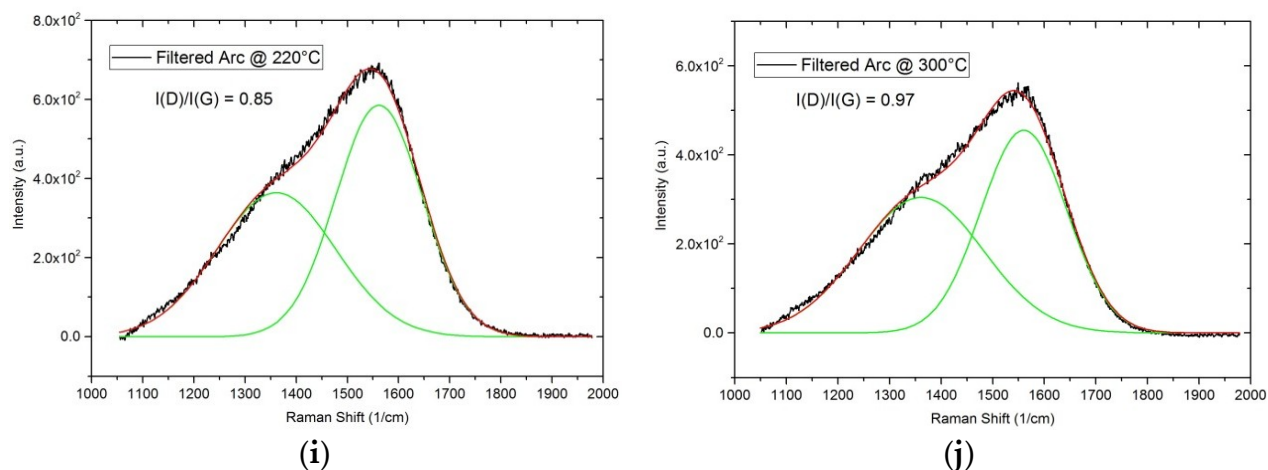

**Figure S2.** Deconvolution of Raman D band and G band (green line) and the resulting fitting curve (red line) for different substrate temperatures: (a–e) for coated in cage, (f–j) for filtered deposition.

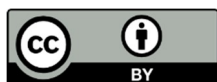

© 2019 by the authors. Submitted for possible open access publication under the terms and conditions of the Creative Commons Attribution (CC BY) license (<http://creativecommons.org/licenses/by/4.0/>).
